# Supplementary material for: Gate-controlled generation of optical pulse trains using individual carbon nanotubes
Source: PubMed Central journal article supplement (PMC4351562; doi:10.1038/ncomms7335), 2015-02-27
Supplement: ncomms7335-s1.pdf [file ncomms7335-s1.pdf]

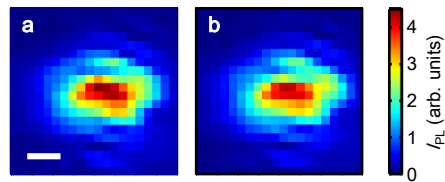

**Supplementary Figure 1 | Imaging measurements.** (a) Photoluminescence image taken at zero gate voltage. (b) Image of the same nanotube under square-wave gate voltage with  $V_a = 2.0$  V and  $V_b = -2.0$  V at  $f = 100$  kHz. A nanotube with a chirality of (10,9) is measured under  $P = 10$   $\mu$ W and  $\lambda_{\text{ex}} = 872$  nm. 50-nm wide spectral integration window centered at  $\lambda_{\text{em}} = 1515$  nm is used for  $I_{\text{PL}}$ . Scale bar is 1  $\mu$ m.

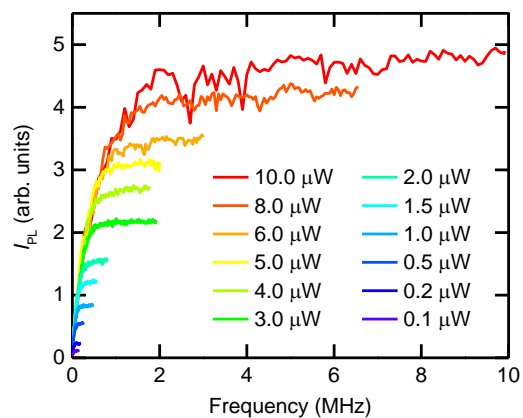

**Supplementary Figure 2 | Higher frequency behavior.** For another nanotube with a chirality of (9,8), frequency dependence measurements have been performed up to  $f = 10$  MHz for  $V_a = 3.0$  V and  $V_b = -3.0$  V. The spectral integration window for  $I_{PL}$  is from  $\lambda_{em} = 1360$  nm to 1410 nm.  $\lambda_{ex} = 802$  nm and  $P = 0.1$   $\mu\text{W}$  to 10.0  $\mu\text{W}$  are used.

## Supplementary Note 1

From the resistivity of  $18.0 \pm 4.5 \text{ } \Omega \text{ cm}$  and the thickness of 260-nm for the top Si layer, sheet resistance becomes 690 k $\Omega$ . Capacitance to the substrate is 3.5 nF cm<sup>-2</sup> for the oxide thickness of 1  $\mu\text{m}$  with relative permittivity of 3.9 for SiO<sub>2</sub>. For a gate dimension of 10  $\mu\text{m}$   $\times$  200  $\mu\text{m}$ , the relevant resistance and capacitance are 35 k $\Omega$  and 69 fF, respectively, resulting in a capacitive cut-off frequency of 67 MHz.
